# Supplementary material
Source: publisher site journal article supplement (https://www.dovepress.com/get_supplementary_file.php?f=365417.docx)
Supplement: Supplementary file 1 [file get_supplementary_file.php]

Supplemental Digital Content

Supplemental Digital Content 1. Survey Questions

| 1) ECT delivery before COVID-19 pandemic   - Number of ECT cases in the year 2019 - Number of ECT cases in April–June 2019 - Number of maintenance ECT cases - Place where ECT was performed before COVID-19 pandemic |
| --- |
| 2) COVID infection prevention measures   - Whether or not COVID infection prevention criteria were discussed with anesthesiologists - Method of defining COVID infection prevention criteria - Sources and materials referred to in defining COVID infection protection criteria - Whether ECT is attempted in cases with low/high possibility of COVID19 infection - Protection of anesthetists/psychiatrists/co-medical staff - Protection of patients from infection - Other protection measures |
| 3) ECT delivery during COVID-19 pandemic   - Number of ECT cases in April–June 2020 - Changes in ECT indications - Changes in the number of maintenance ECT cases - Changes in the number of outpatient ECT cases - Recent changes in the criteria for ECT cases compared with April and May 2020 |
| 4) Questions added to the second questionnaire   - Number of ECT cases in April–June 2021 - Number of maintenance ECT cases in April–June 2021 - Changes in the number of ECT cases in April–June 2021 compared with April–June 2020 - PCR/Antigen/Antibody test at admission - Duration of request for self-isolation before admission - Recent changes in the criteria for ECT compared with August 2020 |

COVID-19, coronavirus disease 2019; ECT, electroconvulsive therapy; PCR, polymerase chain reaction.

Supplemental Digital Content 2. Coronavirus disease 2019 infection control measures used by anesthetists and other healthcare staff for electroconvulsive therapy cases with low risk of infection

| Anesthetist Measures | August 2020 (N = 40) | August 2021 (N = 31) |
| --- | --- | --- |
| Non-N95 masks | 36 (90.0%) | 25 (80.6%) |
| Eye shields | 17 (42.5%) | 21 (67.7%) |
| Surgical gowns | 4 (10.0%) | 4 (12.9%) |
| Vinyl aprons | 6 (15.0%) | 7 (22.6%) |
| N95 masks | 2 (5.0%) | 5 (16.1%) |
| Full PPE | 1 (2.5%) | 2 (6.5%) |
| Gloves | 2 (5.0%) | 1 (3.2%) |
| Face shields | 2 (5.0%) | 1 (3.2%) |

| Healthcare Staff Measures | August 2020 (N = 38) | August 2021 (N = 31) |
| --- | --- | --- |
| Surgical masks | 37 (97.4%) | 26 (83.8%) |
| Eye shields | 14 (36.8%) | 20 (64.5%) |
| Surgical gowns | 2 (5.3%) | 3 (9.7%) |
| Vinyl aprons | 5 (13.2%) | 4 (12.9%) |
| N95 masks | 1 (2.6%) | 5 (16.1%) |
| Full PPE | 0 (0%) | 1 (3.2%) |
| Gloves | 2 (5.2%) | 1 (3.2%) |
| Face shields | 1 (2.6%) | 0 (0%) |

PPE, personal protective equipment.
